# Supplementary material
Source: ML conference proceedings conference paper supplement (https://openreview.net/forum?id=K6iBe17Y16)

tank1

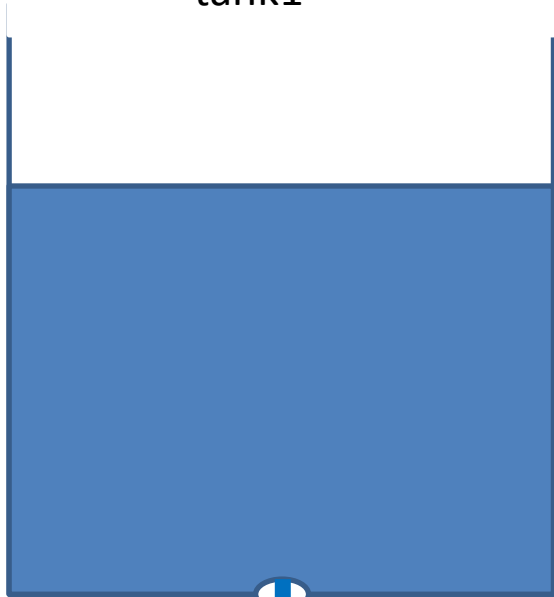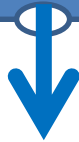

tank2

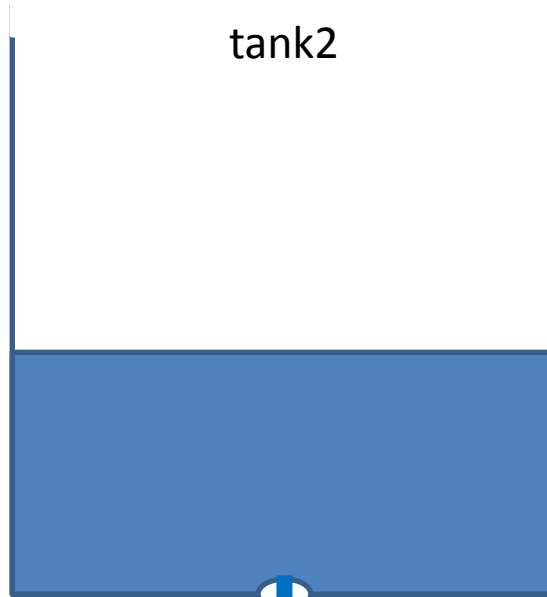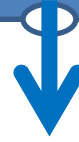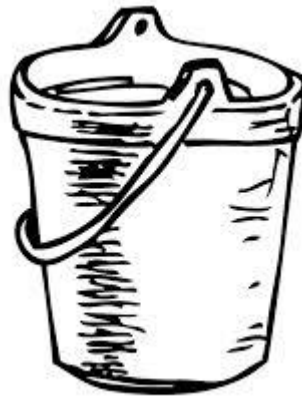

What is the quickest way to fill the bucket?

Supplement: supplementary_material [file attachment]

Light bulb

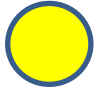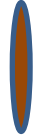

Light Sensor

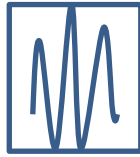

1

Counter

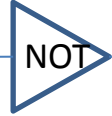

0

Display

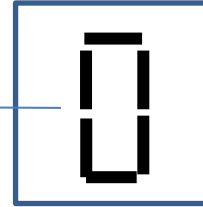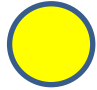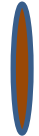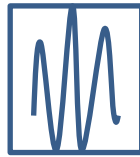

0

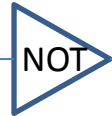

1

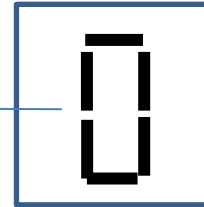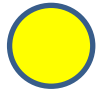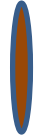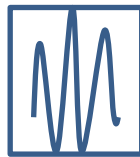

1

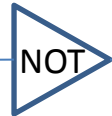

0

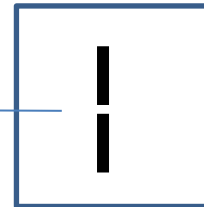

Tray

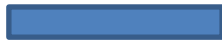

Supplement: supplementary_material [file attachment]
